# Supplementary material for: Green Tea and Java Pepper Mixture Prevents Obesity by Increasing Energy Expenditure and Modulating Hepatic AMPK/MicroRNA-34a/370 Pathway in High-Fat Diet-Fed Rats
Source: MDPI journal article supplement (doi:10.3390/antiox12051053), 2023-05-05
Supplement: s1 [file s1]

## Supplementary Data

**Table S1.** The compositions of experimental diets

|                         | (g / kg diet) |        |        |
|-------------------------|---------------|--------|--------|
| Component               | HF            | GJL    | GJH    |
| Casein                  | 170.73        | 170.73 | 170.73 |
| Sucrose                 | 121.95        | 121.95 | 121.95 |
| Dextrose                | 154.00        | 154.00 | 154.00 |
| Corn starch             | 201.71        | 200.71 | 199.71 |
| Cellulose               | 60.98         | 60.98  | 60.98  |
| Lard                    | 230.50        | 230.50 | 230.50 |
| Mineral mix (AIN-93G)   | 42.68         | 42.68  | 42.68  |
| Vitamin mix (AIN-93)    | 12.20         | 12.20  | 12.20  |
| L-cystein               | 2.20          | 2.20   | 2.20   |
| Choline bitartrate      | 3.05          | 3.05   | 3.05   |
| GJ                      | -             | 1.0    | 2.0    |
| Total                   | 1000          | 1000   | 1000   |
| Energy density (kcal/g) | 4.6           | 4.6    | 4.6    |
| Carbohydrates % (kcal)  | 41.5          | 41.5   | 41.5   |
| Protein % (kcal)        | 13.5          | 13.5   | 13.5   |
| Fat % (kcal)            | 45.0          | 45.0   | 45.0   |

GJ, green tea and java pepper mixture; HF, 45% high-fat diet; GJL, HF with 0.1% GJ; and GJH, HF with 0.2% GJ.

**Table S2.** Primers used for RT-qPCR

| Name           | GeneBank No. | Primer sequence (5'-3')                            |
|----------------|--------------|----------------------------------------------------|
| $\beta$ -actin | NM_031144    | F: GGCACCACACTTTCTACAAT<br>R: AGGTCTCAAACATGATCTGG |
| aP2            | NM_053365    | F: TCACCCCAGATGACAGGAAA<br>R: CATGACACATTCCACCACCA |
| CD36           | NM_031561    | F: CCTGTGAGTTGGCAAGAAGC<br>R: AATGAGCCCACAGTTCCGAT |
| CPT1           | NM_031559    | F: TCGGCAGACCTATTTTGCAC<br>R: ATTTGGCGTAGCTGTCGATG |
| FAS            | NM_017332    | F: GCAGCAGCATGATGTAGCAC<br>R: AGTTGCACACCACAAGGTCA |
| PPAR $\alpha$  | NM_013196    | F: TACCTGTGAACACGATCTGA<br>R: GCTAGTCTTTCCTGCGAGTA |
| SCD1           | NM_139192    | F: GTGGCAGGGCAGGAAATAGT<br>R: CAACACCACAAGAAGCCACG |
| SREBP-1c       | AF286470     | F: AGGAGGCCATCTTGTTGCTT<br>R: GTTTTGACCCTTAGGGCAGC |
| UCP2           | NM_019354    | F: ACTGTCGAAGCCTACAAGAC<br>R: CACCAGCTCAGTACAGTTGA |

aP2, adipocyte protein 2; CD36, cluster of differentiation 36; CPT1, carnitine / palmitoyl-transferase 1; FAS, fatty acid synthase; PPAR $\alpha$ , Peroxisome proliferator-activated receptor alpha; SCD1, stearoyl-CoA desaturase 1; SREBP1-c, sterol regulatory element binding protein 1-c; UCP2, uncoupling protein 2.
